# Supplementary material
Source: PubMed Central journal article supplement (PMC2881659)

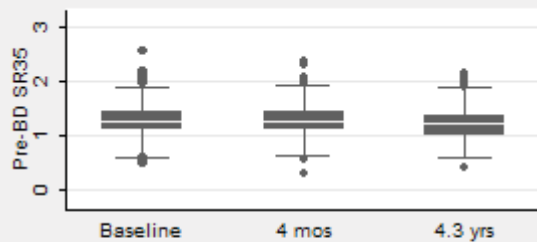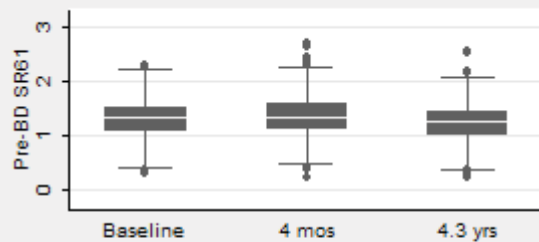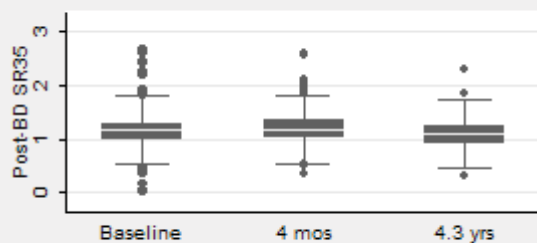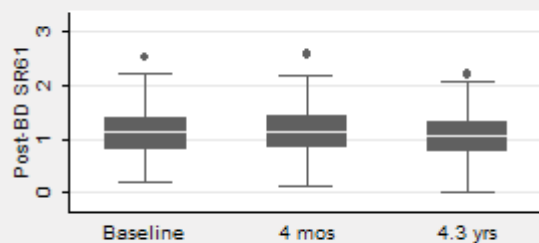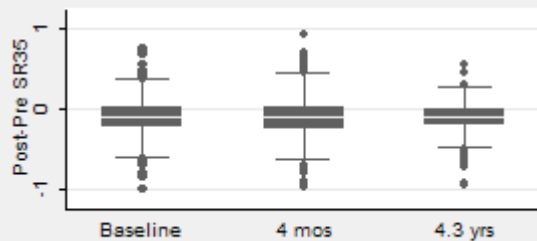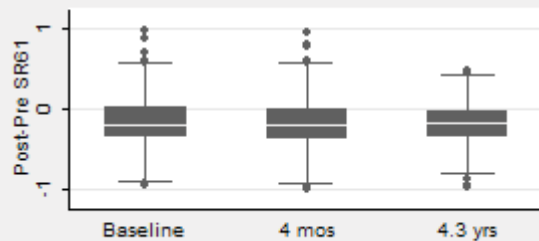

Supplement: NIHMS202643-supplement-Figure_E1.pdf [file NIHMS202643-supplement-Figure_E1.pdf]

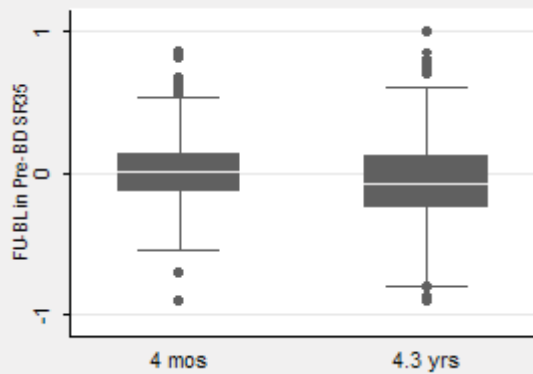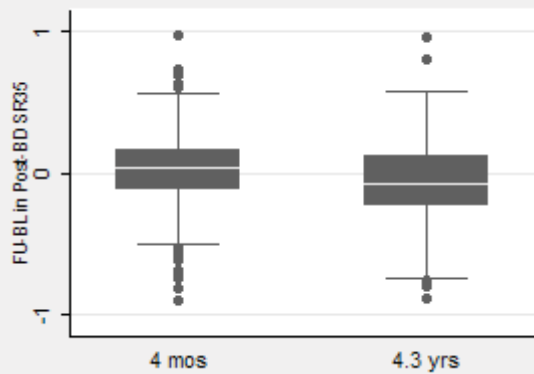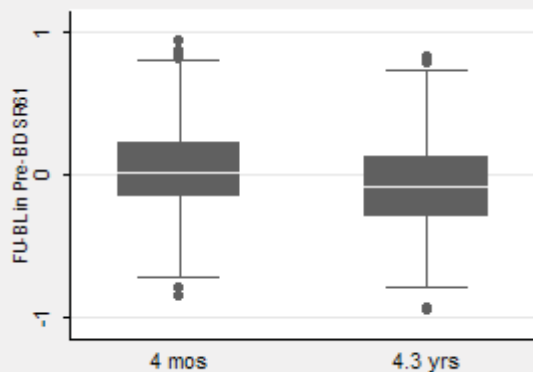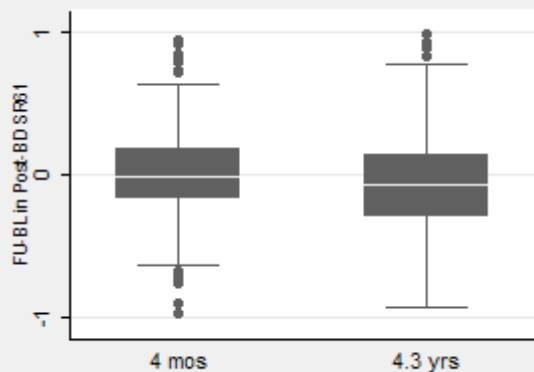

Supplement: NIHMS202643-supplement-Figure_E2.pdf [file NIHMS202643-supplement-Figure_E2.pdf]

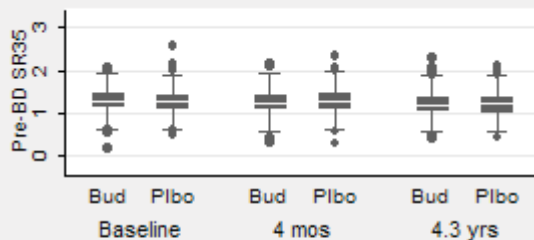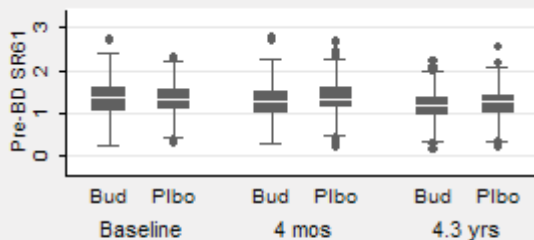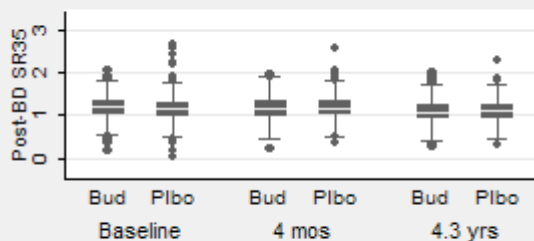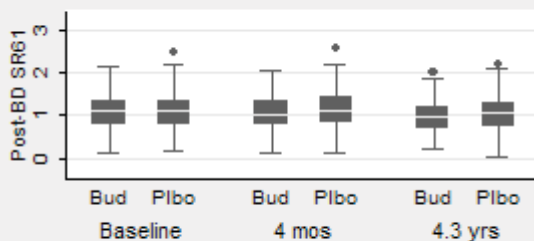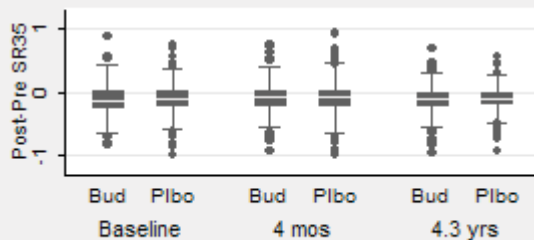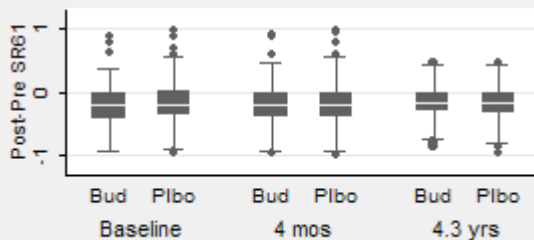

Supplement: NIHMS202643-supplement-Figure_E3.pdf [file NIHMS202643-supplement-Figure_E3.pdf]

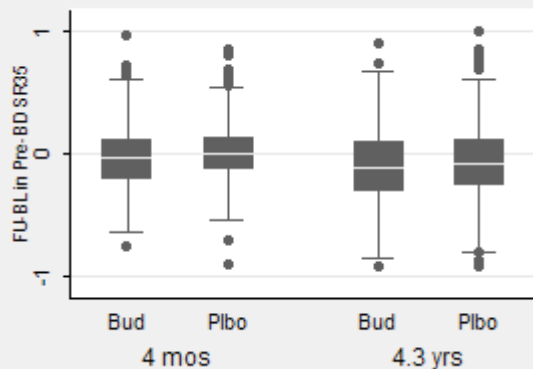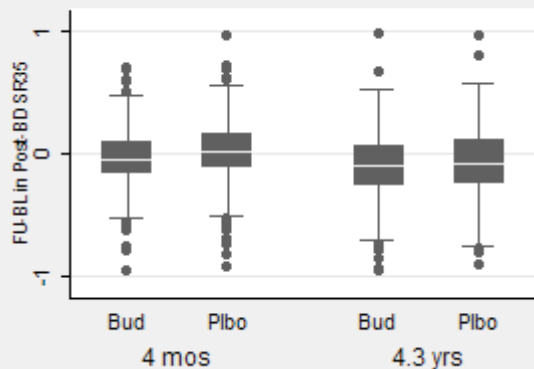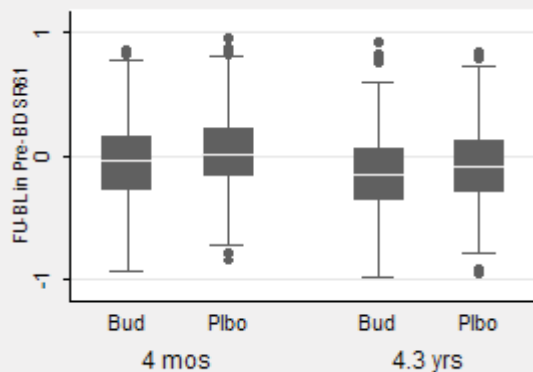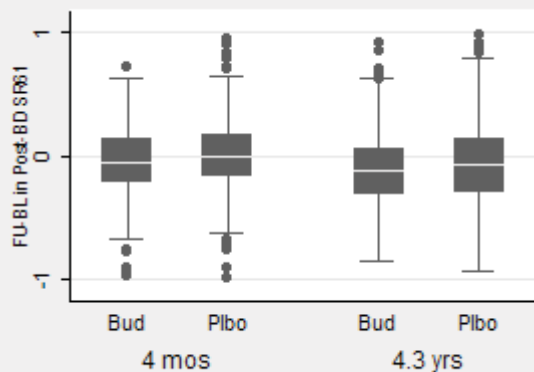

Supplement: NIHMS202643-supplement-Figure_E4.pdf [file NIHMS202643-supplement-Figure_E4.pdf]
